# Supplementary material for: Effect of side-wall functionalisation of multi-walled carbon nanotubes on the thermo-mechanical properties of epoxy composites
Source: Royal Society of Chemistry journal article supplement (doi:10.1039/c6ra00080k), 2016-01-01

# RSC Advances

## Electronic Supplementary Information

### Effect of Sidewall Functionalisation of Multi-walled Carbon Nanotubes on the Thermo-mechanical Properties of Epoxy Composites

Raneesh Konnola and Kuruvilla Joseph\*

Department of Chemistry, Indian Institute of Space Science and Technology,  
Thiruvananthapuram, Kerala-695547, India

\*email : [kjoseph.iist@gmail.com](mailto:kjoseph.iist@gmail.com)

#### Table of contents

Figure S1:  $^1\text{H}$  NMR spectrum of 2-(2-azidoethoxy)ethanol

Figure S2:  $^{13}\text{C}$  NMR spectrum of 2-(2-azidoethoxy)ethanol

Figure S3: FTIR spectra of pristine MWCNT, MWCNT-OH and  
MWCNT-g-CTBN

Figure S1:  $^1\text{H}$  NMR spectrum (500 MHz, 298 K,  $\text{CDCl}_3$ ) of 2-(2-azidoethoxy)ethanol

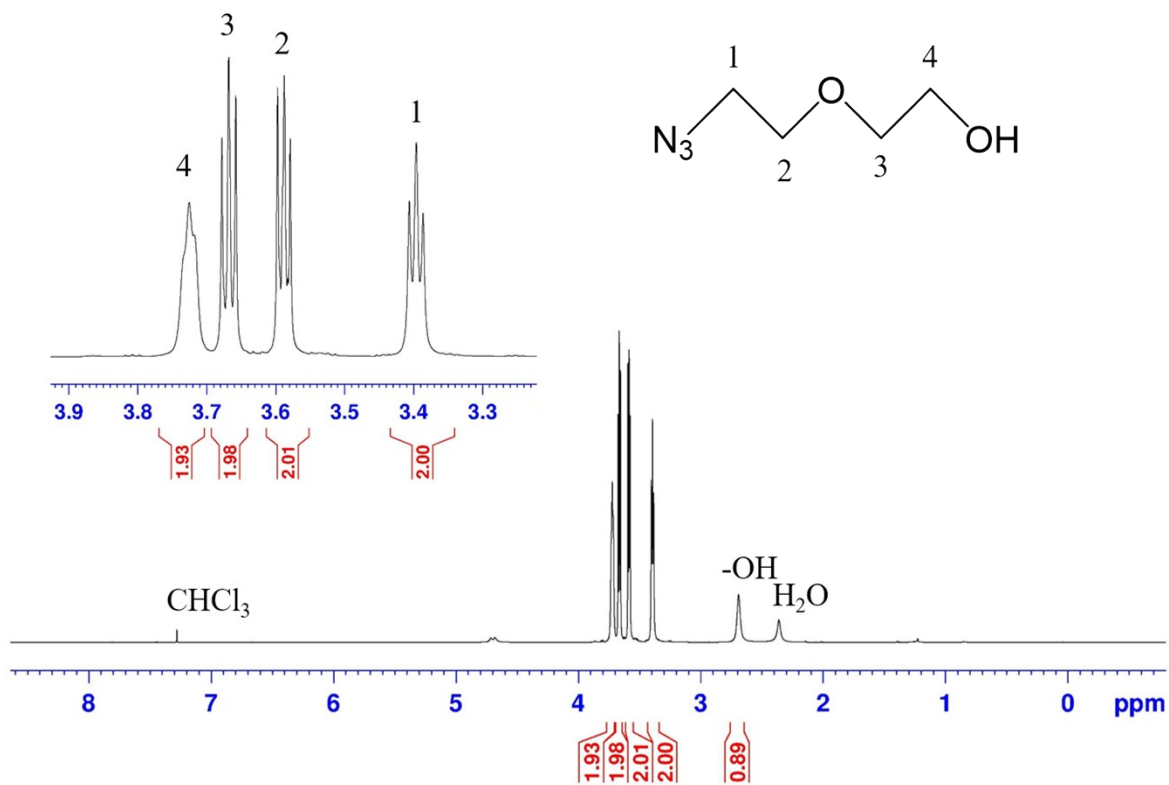

Figure S2:  $^{13}\text{C}$  NMR spectrum (125 MHz, 298 K,  $\text{CDCl}_3$ ) of 2-(2-azidoethoxy)ethanol

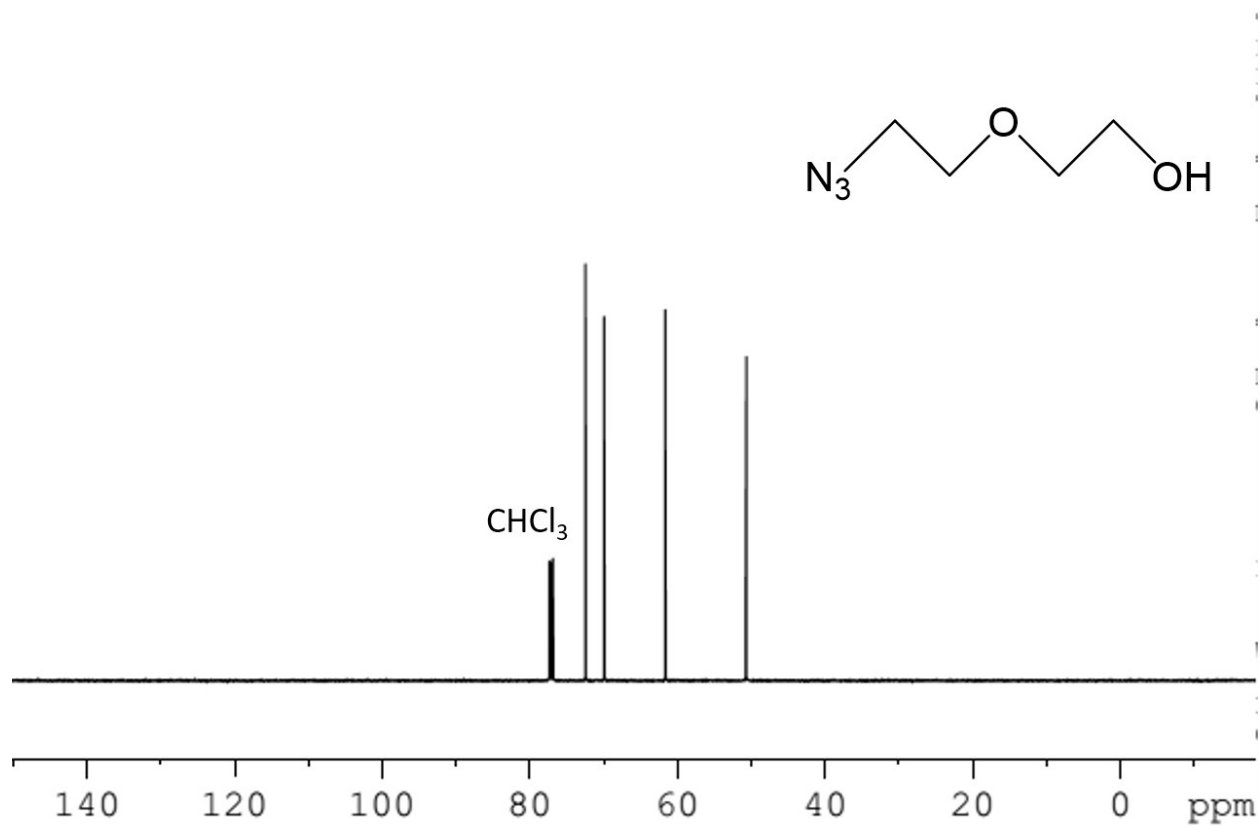

Figure S3: FTIR spectra of pristine MWCNT, MWCNT-OH and MWCNT-g-CTBN

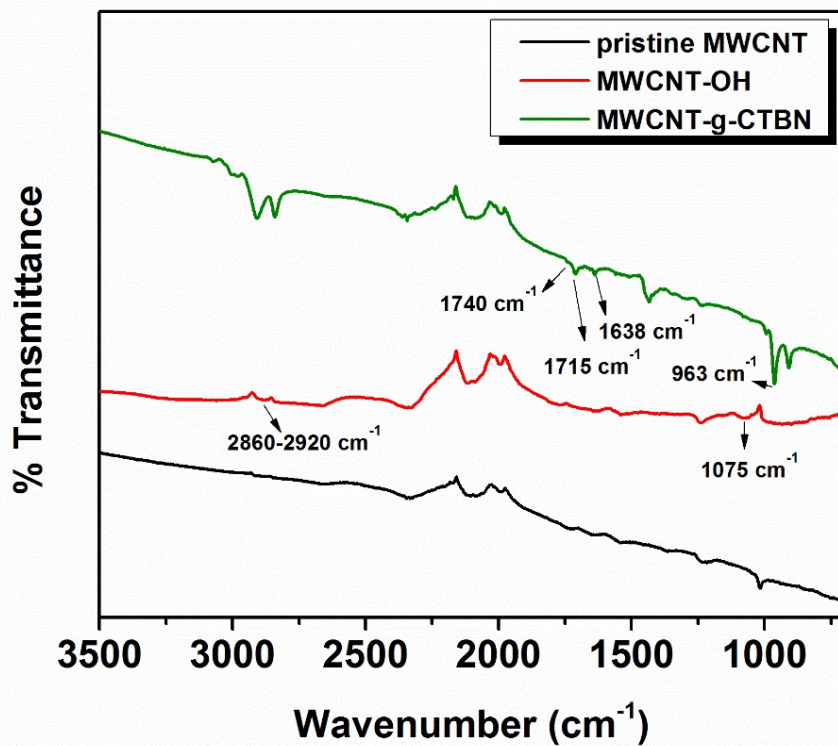

Supplement: c6ra00080k1.pdf [file c6ra00080k1.pdf]
